# Supplementary material for: Systematic scoping review on moral distress among physicians
Source: PubMed Central journal article supplement — BMJ Open. 2022 Sep 2;12(9):e064029. doi: 10.1136/bmjopen-2022-064029 (PMC9442489; doi:10.1136/bmjopen-2022-064029), 2022-09-02
Supplement: bmjopen-2022-064029supp003.pdf [file bmjopen-2022-064029supp003.pdf]

## Supplementary material C. Summary of Thematic Analysis and Direct Content Analysis

| Themes                        | Examples                                                                                                                                                                                                                                                                                                                                                                                                                                                                                                             | Categories         | Examples                                                                                                                                                                                                                                                                                                                                                                                                                                                          |
|-------------------------------|----------------------------------------------------------------------------------------------------------------------------------------------------------------------------------------------------------------------------------------------------------------------------------------------------------------------------------------------------------------------------------------------------------------------------------------------------------------------------------------------------------------------|--------------------|-------------------------------------------------------------------------------------------------------------------------------------------------------------------------------------------------------------------------------------------------------------------------------------------------------------------------------------------------------------------------------------------------------------------------------------------------------------------|
| <b>Characterisation of MD</b> | <p>Violation of individual's core morals and obligations</p> <ol style="list-style-type: none"> <li>1. Threat to an individual's moral integrity</li> <li>2. Inability to fulfil moral obligations to patients, families, and the public</li> </ol> <p>Being pressurised to pursue a course of action that is believed to be unethical.</p> <ol style="list-style-type: none"> <li>1. Complicity in wrongdoing</li> <li>2. Wrongdoing associated with an organization's professional values and practices</li> </ol> | <b>Innate ring</b> | <p>Factors that affect MD</p> <ul style="list-style-type: none"> <li>○ Religion and Spirituality</li> <li>○ Female gender</li> <li>○ Age</li> <li>○ Personal characteristics (e.g. lack of knowledge and assertiveness, perceived lack of autonomy or professional authority, and self-doubt)</li> </ul> <p>Role of humanity in MD</p> <ul style="list-style-type: none"> <li>○ Being human causes factors such as personal feelings to interfere with</li> </ul> |

|  |                                                                                                                                                                                                                                                                                                                                                                                                                                                                                                                                                                                                                                                  |  |                                                                                                                                                                                                                                                                                                                                                                                                                                                                                                                                                                    |
|--|--------------------------------------------------------------------------------------------------------------------------------------------------------------------------------------------------------------------------------------------------------------------------------------------------------------------------------------------------------------------------------------------------------------------------------------------------------------------------------------------------------------------------------------------------------------------------------------------------------------------------------------------------|--|--------------------------------------------------------------------------------------------------------------------------------------------------------------------------------------------------------------------------------------------------------------------------------------------------------------------------------------------------------------------------------------------------------------------------------------------------------------------------------------------------------------------------------------------------------------------|
|  | <p>3. Uncertainty regarding morals but forced to decide</p> <p>Witnessing a course of action that is believed to be unethical</p> <ol style="list-style-type: none"> <li>1. Patient does not receive what is morally judged to be the best treatment</li> <li>2. Conflict between individual conscience and decisions or actions occurring in their environment</li> </ol> <p>Being prevented from pursuing a course of action that is believed to be ethically correct</p> <ol style="list-style-type: none"> <li>1. Being unable to pursue a course of action that is believed to be ethically correct due to perceived constraints</li> </ol> |  | <p>one's ability to be objective, and this can cause MD</p> <ul style="list-style-type: none"> <li>○ Conflict between moral intuition and innate biases in our nature can result in MD</li> <li>○ Assessment of a patient's best interests is subjective, thus forming different beliefs.</li> <li>○ Acting against informed moral judgment creates a conflict of conscience by abandoning/compromising, consciously or unconsciously, convictions (including religiosity), ethical values or norms, and/or personal integrity, thereby resulting in MD</li> </ul> |
|--|--------------------------------------------------------------------------------------------------------------------------------------------------------------------------------------------------------------------------------------------------------------------------------------------------------------------------------------------------------------------------------------------------------------------------------------------------------------------------------------------------------------------------------------------------------------------------------------------------------------------------------------------------|--|--------------------------------------------------------------------------------------------------------------------------------------------------------------------------------------------------------------------------------------------------------------------------------------------------------------------------------------------------------------------------------------------------------------------------------------------------------------------------------------------------------------------------------------------------------------------|

|  |                                                                                                                                                                                                                                                                                                                                                                                                                                                                                                                                                                                                                                            |  |  |
|--|--------------------------------------------------------------------------------------------------------------------------------------------------------------------------------------------------------------------------------------------------------------------------------------------------------------------------------------------------------------------------------------------------------------------------------------------------------------------------------------------------------------------------------------------------------------------------------------------------------------------------------------------|--|--|
|  | <p>2. Being unable to pursue a course of action that is believed to be ethically correct due to perceived institutional or regulatory constraints</p> <p>3. Being unable to pursue a course of action that is believed to be ethically correct due to perceived personal constraints</p> <p>4. Being unable to pursue a course of action that is believed to be ethically correct due to perceived interpersonal constraints</p> <p>5. Having limited power to change situation</p> <p>6. Attempted actions fail to achieve the desired morally acceptable outcome</p> <p>Differences in intensity of MD between physicians and nurses</p> |  |  |
|--|--------------------------------------------------------------------------------------------------------------------------------------------------------------------------------------------------------------------------------------------------------------------------------------------------------------------------------------------------------------------------------------------------------------------------------------------------------------------------------------------------------------------------------------------------------------------------------------------------------------------------------------------|--|--|

|  |                                                                                                                                                                                                                                                                                                                                                                                                                                                                                                                                                                                                                                                            |  |  |
|--|------------------------------------------------------------------------------------------------------------------------------------------------------------------------------------------------------------------------------------------------------------------------------------------------------------------------------------------------------------------------------------------------------------------------------------------------------------------------------------------------------------------------------------------------------------------------------------------------------------------------------------------------------------|--|--|
|  | <ol style="list-style-type: none"><li>1. Nurses have higher levels of MD than physicians</li><li>2. A few studies mentioned that nurses faced lower levels or no difference in MD</li></ol> <p>Differences in causes of MD between physicians and nurses</p> <ol style="list-style-type: none"><li>1. Both physicians and nurses were concerned with decision making</li><li>2. Physicians were more concerned with lack of resources, quality of care, dilemmas or ethical confrontations</li><li>3. Nurses were found to be more affected by perceived lack of power and have a poorer perception of ethical climate as compared to physicians</li></ol> |  |  |
|--|------------------------------------------------------------------------------------------------------------------------------------------------------------------------------------------------------------------------------------------------------------------------------------------------------------------------------------------------------------------------------------------------------------------------------------------------------------------------------------------------------------------------------------------------------------------------------------------------------------------------------------------------------------|--|--|

|                     |                                                                                                                                                                                                                                                                                                                                                                                  |                        |                                                                                                                                                                                           |
|---------------------|----------------------------------------------------------------------------------------------------------------------------------------------------------------------------------------------------------------------------------------------------------------------------------------------------------------------------------------------------------------------------------|------------------------|-------------------------------------------------------------------------------------------------------------------------------------------------------------------------------------------|
|                     | <p>Differences in ways of coping between physicians and other healthcare workers</p> <ol style="list-style-type: none"> <li>1. Physicians have been found to cope with MD better than nurses</li> <li>2. Physicians were less likely to engage in constructive behaviors (venting, mentoring networks, and building team cohesion) than are nurses or ancillary staff</li> </ol> |                        |                                                                                                                                                                                           |
| <b>Causes of MD</b> | <p>Individual level</p> <ol style="list-style-type: none"> <li>1. Powerlessness</li> <li>2. Doubt in personal abilities</li> <li>3. Concerns about personal health</li> <li>4. Concerns about institutional resources and roles</li> <li>5. Decision-making against one's beliefs</li> </ol>                                                                                     | <b>Individual ring</b> | <p>Individual Characteristics Associated with MD</p> <ul style="list-style-type: none"> <li>• Personality traits, coping mechanisms, past experiences and concurrent stressors</li> </ul> |

|  |                                                                                                                                                                                                                                                                                                                                                                                                                                                                                                                      |  |                                                                                                                                                                                                                                                                                                                                                                                                                                                                                                                                                                                             |
|--|----------------------------------------------------------------------------------------------------------------------------------------------------------------------------------------------------------------------------------------------------------------------------------------------------------------------------------------------------------------------------------------------------------------------------------------------------------------------------------------------------------------------|--|---------------------------------------------------------------------------------------------------------------------------------------------------------------------------------------------------------------------------------------------------------------------------------------------------------------------------------------------------------------------------------------------------------------------------------------------------------------------------------------------------------------------------------------------------------------------------------------------|
|  | <p>Patient level</p> <ol style="list-style-type: none"> <li>1. Issues with patient care <ol style="list-style-type: none"> <li>a. Patient is receiving aggressive or futile care that the physician believes may have no benefit or even harm the patient.</li> <li>b. Patient is not receiving or being denied care that the physician believes would be beneficial.</li> <li>c. Withdrawal of life-sustaining treatment that the physician believes may prematurely end the patient's life.</li> </ol> </li> </ol> |  | <ul style="list-style-type: none"> <li>• Those who are less certain about what is “right” may have less related MD</li> </ul> <p>Beliefs and perceptions affected in MD</p> <ul style="list-style-type: none"> <li>• Perceived violation of values, threatening of moral integrity</li> <li>• Perception of futility of care/ more life-sustaining treatment than the physician believes is appropriate</li> <li>• Disconnect between perceived ethical practice and delivered clinical practice</li> <li>• Perception that care does not respect patient's dignity and autonomy</li> </ul> |
|--|----------------------------------------------------------------------------------------------------------------------------------------------------------------------------------------------------------------------------------------------------------------------------------------------------------------------------------------------------------------------------------------------------------------------------------------------------------------------------------------------------------------------|--|---------------------------------------------------------------------------------------------------------------------------------------------------------------------------------------------------------------------------------------------------------------------------------------------------------------------------------------------------------------------------------------------------------------------------------------------------------------------------------------------------------------------------------------------------------------------------------------------|

|  |                                                                                                                                                                                                                                                                                                                                                                                                                                                                                                                                 |  |                                                                                                                                                                                                                                                                                                                                                                                                                                                                                                                     |
|--|---------------------------------------------------------------------------------------------------------------------------------------------------------------------------------------------------------------------------------------------------------------------------------------------------------------------------------------------------------------------------------------------------------------------------------------------------------------------------------------------------------------------------------|--|---------------------------------------------------------------------------------------------------------------------------------------------------------------------------------------------------------------------------------------------------------------------------------------------------------------------------------------------------------------------------------------------------------------------------------------------------------------------------------------------------------------------|
|  | <p>d. Administration of interventions that the physician believes may prematurely end the patient's life.</p> <p>e. Being unable to achieve professional standards of care</p> <p>f. Lack of consistency or continuity of care</p> <p>g. Personal biases against patients which may interfere with the quality of care provided to patients</p> <p>h. Lack of respect for patients and patient autonomy</p> <p>i. Involvement in a medical error</p> <p>j. Physician has to lie to secure resources or care for the patient</p> |  | <ul style="list-style-type: none"> <li>• Treating patients whose plan of care was poorly defined</li> <li>• Having to work with limited levels of staffing which one considered unsafe</li> <li>• Incongruence between personal values and values of their organisation/ institutional constraints</li> </ul> <p>Internal conflicts and personal doubts causing MD</p> <ul style="list-style-type: none"> <li>• Being given more responsibility and freedom than they felt they were qualified to handle</li> </ul> |
|--|---------------------------------------------------------------------------------------------------------------------------------------------------------------------------------------------------------------------------------------------------------------------------------------------------------------------------------------------------------------------------------------------------------------------------------------------------------------------------------------------------------------------------------|--|---------------------------------------------------------------------------------------------------------------------------------------------------------------------------------------------------------------------------------------------------------------------------------------------------------------------------------------------------------------------------------------------------------------------------------------------------------------------------------------------------------------------|

|  |                                                                                                                                                                                                                                                                                                                                                                                                                                                                                                                       |  |                                                                                                                                                                                                                                                                                                                                                                                                                                                                                                                                                                                                                                           |
|--|-----------------------------------------------------------------------------------------------------------------------------------------------------------------------------------------------------------------------------------------------------------------------------------------------------------------------------------------------------------------------------------------------------------------------------------------------------------------------------------------------------------------------|--|-------------------------------------------------------------------------------------------------------------------------------------------------------------------------------------------------------------------------------------------------------------------------------------------------------------------------------------------------------------------------------------------------------------------------------------------------------------------------------------------------------------------------------------------------------------------------------------------------------------------------------------------|
|  | <p>k. Inequality between patients in terms of the care they receive</p> <p>l. Patient is 'irresponsible' (e.g. continues to maintain a lifestyle detrimental to health)</p> <p>2. Issues with patient communication</p> <p>a. Deceiving or withholding full information about their medical condition(s) from patients</p> <p>b. Provision of inadequate information to the patient or family</p> <p>c. Providing false hope to patients and families</p> <p>d. Inadequate informed consent for medical decisions</p> |  | <ul style="list-style-type: none"> <li>• Conflict between personal beliefs and desires of the patient/ patient's family/ surrogate decision-maker</li> <li>• Dilemmas surrounding observed ethical misconduct/ unethical behaviour by colleagues</li> <li>• Dilemmas regarding prioritisation and resource allocation</li> <li>• Conflict between spending extensive resources and patient care</li> <li>• Conflict between individual desire to care for patients and limitations based on public policy guidelines</li> <li>• Common clinical dilemmas e.g. balancing a duty to minimize patient harm (nonmaleficence) while</li> </ul> |
|--|-----------------------------------------------------------------------------------------------------------------------------------------------------------------------------------------------------------------------------------------------------------------------------------------------------------------------------------------------------------------------------------------------------------------------------------------------------------------------------------------------------------------------|--|-------------------------------------------------------------------------------------------------------------------------------------------------------------------------------------------------------------------------------------------------------------------------------------------------------------------------------------------------------------------------------------------------------------------------------------------------------------------------------------------------------------------------------------------------------------------------------------------------------------------------------------------|



|  |                                                                                                                                                                                                                                                                                                                                                                                                                                                                                                             |  |                                                                                                                                                                                                                                                                                                                                                                                                                                                                                                                                                                                |
|--|-------------------------------------------------------------------------------------------------------------------------------------------------------------------------------------------------------------------------------------------------------------------------------------------------------------------------------------------------------------------------------------------------------------------------------------------------------------------------------------------------------------|--|--------------------------------------------------------------------------------------------------------------------------------------------------------------------------------------------------------------------------------------------------------------------------------------------------------------------------------------------------------------------------------------------------------------------------------------------------------------------------------------------------------------------------------------------------------------------------------|
|  | <p>e. Poor communication giving rise to differences in understanding between physician and patient or family</p> <p>3. Mismatch between and physician's and patient's/family's goals of care</p> <p>a. Family requests the provision of aggressive or futile care that the physician believes may have no benefit or even harm the patient.</p> <p>b. Family goals differ from physician's goals (e.g. preservation of life vs quality of life)</p> <p>c. Conflict with family regarding patient's care</p> |  | <p>facilitating patient autonomy, honouring advance care preferences including decisions to resuscitate or not, or withholding or withdrawing of life-sustaining treatments</p> <p>Impact of MD on the individual</p> <ul style="list-style-type: none"> <li>• Impact on personal Wellbeing <ul style="list-style-type: none"> <li>• Psychological Health (e.g. Depression, Post-Traumatic Stress Disorder)</li> <li>• Emotional Consequences (e.g. Burnout and emotional exhaustion, Frustration, anger, sadness, guilt, fear, defeat, demoralization)</li> </ul> </li> </ul> |
|--|-------------------------------------------------------------------------------------------------------------------------------------------------------------------------------------------------------------------------------------------------------------------------------------------------------------------------------------------------------------------------------------------------------------------------------------------------------------------------------------------------------------|--|--------------------------------------------------------------------------------------------------------------------------------------------------------------------------------------------------------------------------------------------------------------------------------------------------------------------------------------------------------------------------------------------------------------------------------------------------------------------------------------------------------------------------------------------------------------------------------|

|  |                                                                                                                                                                                                                                                                                                                                                                                                                                                                                                       |  |                                                                                                                                                                                                                                                                                                                                                                                                                                                                                 |
|--|-------------------------------------------------------------------------------------------------------------------------------------------------------------------------------------------------------------------------------------------------------------------------------------------------------------------------------------------------------------------------------------------------------------------------------------------------------------------------------------------------------|--|---------------------------------------------------------------------------------------------------------------------------------------------------------------------------------------------------------------------------------------------------------------------------------------------------------------------------------------------------------------------------------------------------------------------------------------------------------------------------------|
|  | <p>d. Disagreement with patient regarding care plan</p> <p>e. Unrealistic patient or family expectations and demands</p> <p>f. MD arises due to attempted shared decision making</p> <p>4. Caring for vulnerable patients</p> <p>a. Patient or family is unable to afford care</p> <p>b. Patient is vulnerable or unable to express his/her wishes</p> <p>c. Uncertainty about the patient's capacity to make or change decisions</p> <p>d. Family is unable to provide adequate care for patient</p> |  | <ul style="list-style-type: none"> <li>• Moral Consequences (e.g. Moral outrage, feeling that core values had been violated, Moral residue/persistent doubt and distress, Moral desensitization)</li> <li>• Cognitive Consequences (e.g. Distractedness, cognitive errors)</li> <li>• Physical Health (e.g. Physical toll, exhaustion)</li> <li>• Powerlessness, self-blame, sense of personal failure</li> <li>• Compassion fatigue</li> <li>• Work-related impacts</li> </ul> |
|--|-------------------------------------------------------------------------------------------------------------------------------------------------------------------------------------------------------------------------------------------------------------------------------------------------------------------------------------------------------------------------------------------------------------------------------------------------------------------------------------------------------|--|---------------------------------------------------------------------------------------------------------------------------------------------------------------------------------------------------------------------------------------------------------------------------------------------------------------------------------------------------------------------------------------------------------------------------------------------------------------------------------|

|  |                                                                                                                                                                                                                                                                                                                                                                                                                                                |  |                                                                                                                                                                                                                                                                                                                                                                                                                                                                                                                           |
|--|------------------------------------------------------------------------------------------------------------------------------------------------------------------------------------------------------------------------------------------------------------------------------------------------------------------------------------------------------------------------------------------------------------------------------------------------|--|---------------------------------------------------------------------------------------------------------------------------------------------------------------------------------------------------------------------------------------------------------------------------------------------------------------------------------------------------------------------------------------------------------------------------------------------------------------------------------------------------------------------------|
|  | <p>5. Interacting with abusive patients and families</p> <p>a. Patient is rude or abusive</p> <p>b. Abusive family members</p> <p>c. Patient is ‘exploitative’ (e.g. abuses resources such as government aid)</p> <p>6. Being involved in patient and family suffering</p> <p>a. Witnessing patient’s pain and suffering</p> <p>b. Family unpreparedness to face patient’s death</p> <p>c. Family suffers as they watch the patient suffer</p> |  | <ul style="list-style-type: none"> <li>• Intention to quit</li> <li>• increase in errors and adverse events</li> <li>• Hypervigilant, more focused and attentive towards patients, feeling the need to advocate for them</li> <li>• Motivation to work to improve the system of care</li> </ul> <p>Coping strategies employed by individuals to manage MD</p> <ul style="list-style-type: none"> <li>• Compartmentalization of emotions, leaving concerns at work to prevent them from affecting personal life</li> </ul> |
|--|------------------------------------------------------------------------------------------------------------------------------------------------------------------------------------------------------------------------------------------------------------------------------------------------------------------------------------------------------------------------------------------------------------------------------------------------|--|---------------------------------------------------------------------------------------------------------------------------------------------------------------------------------------------------------------------------------------------------------------------------------------------------------------------------------------------------------------------------------------------------------------------------------------------------------------------------------------------------------------------------|

|  |                                                                                                                                                                                                                                                                                                                                                                                                                                                                 |  |                                                                                                                                                                                                                                                                                                                                                                                                                                                                                                                                                                                  |
|--|-----------------------------------------------------------------------------------------------------------------------------------------------------------------------------------------------------------------------------------------------------------------------------------------------------------------------------------------------------------------------------------------------------------------------------------------------------------------|--|----------------------------------------------------------------------------------------------------------------------------------------------------------------------------------------------------------------------------------------------------------------------------------------------------------------------------------------------------------------------------------------------------------------------------------------------------------------------------------------------------------------------------------------------------------------------------------|
|  | <p>d. Unexpected death of a healthy young person</p> <p>e. Treating a patient may harm the wellbeing and finances of his/her family</p> <p>7. Being involved in legal issues</p> <p>a. Disclosure of patient information against the patient's wishes</p> <p>b. Giving in to family's wishes due to fear of a lawsuit</p> <p>Institutional/hospital/team level</p> <p>1. Resource constraints</p> <p>a. Human resource,</p> <p>b. Materials,</p> <p>c. Time</p> |  | <ul style="list-style-type: none"> <li>• Conscious effort to separate emotional responses from the clinical encounter</li> <li>• Coping through thoroughness – evaluating rational arguments, engaging in formal deliberation, utilising protocols, care pathways</li> <li>• More likely to find support from outside of the institution (e.g. spending time with family, exercising, alcohol)</li> <li>• Both self-constructive (e.g. exercise), and self-destructive (e.g. alcohol)</li> <li>• Mindfulness and self-care practices (e.g. physical activity, mindful</li> </ul> |
|--|-----------------------------------------------------------------------------------------------------------------------------------------------------------------------------------------------------------------------------------------------------------------------------------------------------------------------------------------------------------------------------------------------------------------------------------------------------------------|--|----------------------------------------------------------------------------------------------------------------------------------------------------------------------------------------------------------------------------------------------------------------------------------------------------------------------------------------------------------------------------------------------------------------------------------------------------------------------------------------------------------------------------------------------------------------------------------|

|  |                                                                                                                                                                                                                                                                                                                                                                                                                                                                                                                                                                                                                     |  |                                                                                                                                                                                                                                                                                                                                                                                                                                                                                                                                       |
|--|---------------------------------------------------------------------------------------------------------------------------------------------------------------------------------------------------------------------------------------------------------------------------------------------------------------------------------------------------------------------------------------------------------------------------------------------------------------------------------------------------------------------------------------------------------------------------------------------------------------------|--|---------------------------------------------------------------------------------------------------------------------------------------------------------------------------------------------------------------------------------------------------------------------------------------------------------------------------------------------------------------------------------------------------------------------------------------------------------------------------------------------------------------------------------------|
|  | <p>2. Administrative deficiencies</p> <ul style="list-style-type: none"> <li>a. Lack of administrative support,</li> <li>b. Inadequate training,</li> <li>c. Poor continuity of care,</li> <li>d. Lacking appropriate medical knowledge,</li> <li>e. Collusion</li> </ul> <p>3. Organizational structure</p> <ul style="list-style-type: none"> <li>a. Disagreement with policies</li> <li>b. Disagreements with teammate,</li> <li>c. Distrust within team,</li> <li>d. Poor ethical climate,</li> <li>e. Poor teamwork,</li> <li>f. Hierarchical issues,</li> <li>g. Ineffective/restrictive policies,</li> </ul> |  | <p>focusing, meditation, breathing exercises, and positive interactions with friends)</p> <ul style="list-style-type: none"> <li>• Maintaining emotional neutrality</li> <li>• Deliberate and thoughtful introspection with support, including consultation with third parties</li> <li>• Developing moral resilience</li> <li>• Less frequently, by positive reframing and humour</li> <li>• Opting to no longer be involved in that case</li> <li>• Junior doctors may cope by granting autonomy to their superiors, but</li> </ul> |
|--|---------------------------------------------------------------------------------------------------------------------------------------------------------------------------------------------------------------------------------------------------------------------------------------------------------------------------------------------------------------------------------------------------------------------------------------------------------------------------------------------------------------------------------------------------------------------------------------------------------------------|--|---------------------------------------------------------------------------------------------------------------------------------------------------------------------------------------------------------------------------------------------------------------------------------------------------------------------------------------------------------------------------------------------------------------------------------------------------------------------------------------------------------------------------------------|

|                         |                                                                                                                                                                                                                                            |                        |                                                                                                                                                                                                                                                                                                                                         |
|-------------------------|--------------------------------------------------------------------------------------------------------------------------------------------------------------------------------------------------------------------------------------------|------------------------|-----------------------------------------------------------------------------------------------------------------------------------------------------------------------------------------------------------------------------------------------------------------------------------------------------------------------------------------|
|                         | <p>h. Poor role-modelling from superiors</p> <p>4. Societal causes</p> <p>a. Feelings of being unappreciated by others,</p> <p>b. Fear of being sued by patient,</p> <p>c. Insurance pressure, Unjust distribution of healthcare, etc)</p> |                        | <p>develop a different coping style later in their career</p> <ul style="list-style-type: none"> <li>• Most dealt with MD inwardly or did not deal with it at all</li> </ul>                                                                                                                                                            |
| <b>Influences of MD</b> | <p>Risk factors</p> <p>1. Personal characteristics</p> <p>a. Females gender</p> <p>b. Fewer years of experience</p> <p>c. Personality traits such as sympathy, lack of assertiveness, poor self-esteem, or lack of flexibility</p>         | <b>Relational ring</b> | <p>A dilemma between choosing to serve the patient and risking infection or not serving the patient to protect own family</p> <p>Impact on relationships with loved ones</p> <ul style="list-style-type: none"> <li>• Disruptions in relationship with family/closed ones (e.g marital conflict, family disruption, divorce)</li> </ul> |

|  |                                                                                                                                                                                                                                                                                                                                                                                                                                                                                                    |  |                                                                                                                                                                                                                                                                                                                                                                                                                                                                                                                                                                            |
|--|----------------------------------------------------------------------------------------------------------------------------------------------------------------------------------------------------------------------------------------------------------------------------------------------------------------------------------------------------------------------------------------------------------------------------------------------------------------------------------------------------|--|----------------------------------------------------------------------------------------------------------------------------------------------------------------------------------------------------------------------------------------------------------------------------------------------------------------------------------------------------------------------------------------------------------------------------------------------------------------------------------------------------------------------------------------------------------------------------|
|  | <p>d. Poor physician well-being due to psychological strains and stressor</p> <p>e. Lack of social support</p> <p>2. Workplace factors</p> <p>a. Irregular working hours/ night shifts</p> <p>b. Negative work environment (negative ethical climate, stressful work environment, lack of a collaborative team, an environment where profit is prioritised over patient care)</p> <p>c. Lack of provider continuity</p> <p>d. Lack of good leadership to handle morally distressing situations</p> |  | <ul style="list-style-type: none"> <li>• Difficulty in balancing professional and family roles; inadequate work-life balance</li> <li>• Feeling of isolation from family, friends, and colleagues</li> </ul> <p>Interventions aimed at improving relationships</p> <ul style="list-style-type: none"> <li>• Effective coping and resilience can be nurtured through relational activities with colleagues, employers, and friends (e.g. peer support, positive interactions)</li> <li>• Informal debriefing with a trusted colleague or mentor after a death or</li> </ul> |
|--|----------------------------------------------------------------------------------------------------------------------------------------------------------------------------------------------------------------------------------------------------------------------------------------------------------------------------------------------------------------------------------------------------------------------------------------------------------------------------------------------------|--|----------------------------------------------------------------------------------------------------------------------------------------------------------------------------------------------------------------------------------------------------------------------------------------------------------------------------------------------------------------------------------------------------------------------------------------------------------------------------------------------------------------------------------------------------------------------------|

|  |                                                                                                                                                                                                                                                                                                                                                                                                                                                                                                                  |  |                                                                                                                                                                                                                                                                                                                                                                              |
|--|------------------------------------------------------------------------------------------------------------------------------------------------------------------------------------------------------------------------------------------------------------------------------------------------------------------------------------------------------------------------------------------------------------------------------------------------------------------------------------------------------------------|--|------------------------------------------------------------------------------------------------------------------------------------------------------------------------------------------------------------------------------------------------------------------------------------------------------------------------------------------------------------------------------|
|  | <p>e. Being involved in the direct care of patients</p> <p>3. Certain specialisations such as emergency medicine, oncology, adult medicine, adult, paediatric and neonatal intensive care</p> <p>4. Societal factors</p> <p>a. A deficient health care system</p> <p>b. Lack of proper legislation leading to low government expenditure on health care</p> <p>5. Disasters or emergencies</p> <p>a. Unfair allocation of scarce resources</p> <p>b. Increase in the number of distress-provoking situations</p> |  | <p>traumatic experience to mitigate personal emotional recovery</p> <ul style="list-style-type: none"> <li>• Interactions with children</li> <li>• Creating environments that allow acknowledgement of MD by clinical and educational leaders</li> <li>• Encouraging research of the psychological impact of MD on family, personal relationships and social life</li> </ul> |
|--|------------------------------------------------------------------------------------------------------------------------------------------------------------------------------------------------------------------------------------------------------------------------------------------------------------------------------------------------------------------------------------------------------------------------------------------------------------------------------------------------------------------|--|------------------------------------------------------------------------------------------------------------------------------------------------------------------------------------------------------------------------------------------------------------------------------------------------------------------------------------------------------------------------------|



|  |                                                                                                                                                                                                                                                                                                                                                                                                                                                                                                                                                                                                                                 |  |  |
|--|---------------------------------------------------------------------------------------------------------------------------------------------------------------------------------------------------------------------------------------------------------------------------------------------------------------------------------------------------------------------------------------------------------------------------------------------------------------------------------------------------------------------------------------------------------------------------------------------------------------------------------|--|--|
|  | <ul style="list-style-type: none"><li>c. Sub-standard care due to resource scarcity</li><li>d. Experience of secondary or vicarious trauma</li><li>e. End of life care</li></ul> <p>Protective factors</p> <ul style="list-style-type: none"><li>1. Certain personal characteristics including<ul style="list-style-type: none"><li>a. Older age</li><li>b. Being married or partnered</li><li>c. Having good values</li><li>d. Being able to maintain a state of emotional neutrality and/or positive orientation</li><li>e. Being psychologically empowered</li><li>f. Being more skillful or experienced</li></ul></li></ul> |  |  |
|--|---------------------------------------------------------------------------------------------------------------------------------------------------------------------------------------------------------------------------------------------------------------------------------------------------------------------------------------------------------------------------------------------------------------------------------------------------------------------------------------------------------------------------------------------------------------------------------------------------------------------------------|--|--|

|  |                                                                                                                                                                                                                                                                                                                                                                                                                                                                                                                                                                                                                                       |  |  |
|--|---------------------------------------------------------------------------------------------------------------------------------------------------------------------------------------------------------------------------------------------------------------------------------------------------------------------------------------------------------------------------------------------------------------------------------------------------------------------------------------------------------------------------------------------------------------------------------------------------------------------------------------|--|--|
|  | <ul style="list-style-type: none"><li>g. Being better communicators</li><li>h. Holding a power position in medical hierarchy</li></ul> <p>2. Factors related to patient care</p> <ul style="list-style-type: none"><li>a. Caring for patients who reside in nursing homes, have advance care planning or older aged patients</li><li>b. Having emotional connections with patients</li><li>c. Working as a pediatrician</li></ul> <p>3. Team factors</p> <ul style="list-style-type: none"><li>a. Open communication within the team</li><li>b. Sharing knowledge and skills amongst colleagues in the same healthcare team</li></ul> |  |  |
|--|---------------------------------------------------------------------------------------------------------------------------------------------------------------------------------------------------------------------------------------------------------------------------------------------------------------------------------------------------------------------------------------------------------------------------------------------------------------------------------------------------------------------------------------------------------------------------------------------------------------------------------------|--|--|

|  |                                                                                                                                                                                                                                                                                                                                                                                                                                                                                                                                                                  |  |  |
|--|------------------------------------------------------------------------------------------------------------------------------------------------------------------------------------------------------------------------------------------------------------------------------------------------------------------------------------------------------------------------------------------------------------------------------------------------------------------------------------------------------------------------------------------------------------------|--|--|
|  | <ul style="list-style-type: none"><li>c. Effective teamwork where discussion about patient care plan is encouraged and practiced</li><li>d. Good team dynamics which includes good interpersonal relationships</li></ul> <p>4. Institutional factors</p> <ul style="list-style-type: none"><li>a. Training physicians with ethics</li><li>b. Conducive and supportive work environment</li><li>c. Allowing physicians to have more autonomy and control</li><li>d. Promotion of person's ability to practice his or her faith</li></ul> <p>Changes with time</p> |  |  |
|--|------------------------------------------------------------------------------------------------------------------------------------------------------------------------------------------------------------------------------------------------------------------------------------------------------------------------------------------------------------------------------------------------------------------------------------------------------------------------------------------------------------------------------------------------------------------|--|--|

|                     |                                                                                                                                                                                                                                                                                                                                                                                                                               |                      |                                                                                                                                                                                           |
|---------------------|-------------------------------------------------------------------------------------------------------------------------------------------------------------------------------------------------------------------------------------------------------------------------------------------------------------------------------------------------------------------------------------------------------------------------------|----------------------|-------------------------------------------------------------------------------------------------------------------------------------------------------------------------------------------|
|                     | <ol style="list-style-type: none"> <li>1. Build-up of MD over time with repeated exposures that result in a moral residue and is described as the crescendo effect</li> <li>2. MD would gradually decrease or even disappear over time with more experience and by having more authority or autonomy</li> <li>3. Chronic, unmitigated, or repeated experiences of MD often generate an ongoing sense of deficiency</li> </ol> |                      |                                                                                                                                                                                           |
| <b>Impact of MD</b> | <p>Negative impacts to self</p> <ol style="list-style-type: none"> <li>1. Development of negative emotions (frustration, anger, guilt, sadness, depression, demoralised, defeated)</li> <li>2. Feeling isolated, distant or lonely</li> </ol>                                                                                                                                                                                 | <b>Societal ring</b> | <p>Resource constraints and rationing limiting adequate patient care</p> <ul style="list-style-type: none"> <li>• Insufficient resources (e.g. staff, PPE, ventilators, money)</li> </ul> |

|  |                                                                                                                                                                                                                                                                                                                                                                                                                                                                                         |  |                                                                                                                                                                                                                                                                                                                                                                                                                                                                                 |
|--|-----------------------------------------------------------------------------------------------------------------------------------------------------------------------------------------------------------------------------------------------------------------------------------------------------------------------------------------------------------------------------------------------------------------------------------------------------------------------------------------|--|---------------------------------------------------------------------------------------------------------------------------------------------------------------------------------------------------------------------------------------------------------------------------------------------------------------------------------------------------------------------------------------------------------------------------------------------------------------------------------|
|  | <p>3. Becoming desensitised (depersonalised, indifferent, apathetic)</p> <p>4. Low sense of personal accomplishment (feelings of inadequacy, loss of self-worth, self-doubt, decreased self-esteem, powerlessness, worthlessness, disempowerment)</p> <p>5. Development of individual coping mechanisms in response to emotions experienced</p> <p>6. Quitting of job, or having an intention/consideration to</p> <p>7. Being absent from work</p> <p>8. Regretting to do medicine</p> |  | <ul style="list-style-type: none"> <li>• Unfair, unacceptable and lack of explicit criteria on resource allocation</li> </ul> <p>Institutional rules and policies leading to MD</p> <ul style="list-style-type: none"> <li>• Institutional constraints prevent physicians from doing what they think is right for the patient</li> <li>• Organisational pressures e.g. in cost reduction</li> <li>• Lack of guidance (institutional/legislative) for decision making</li> </ul> |
|--|-----------------------------------------------------------------------------------------------------------------------------------------------------------------------------------------------------------------------------------------------------------------------------------------------------------------------------------------------------------------------------------------------------------------------------------------------------------------------------------------|--|---------------------------------------------------------------------------------------------------------------------------------------------------------------------------------------------------------------------------------------------------------------------------------------------------------------------------------------------------------------------------------------------------------------------------------------------------------------------------------|

|  |                                                                                                                                                                                                                                                                                                                                                                                                                                                                                                                                                                                        |  |                                                                                                                                                                                                                                                                                                                                                                                                                                                                                                                                                                                                  |
|--|----------------------------------------------------------------------------------------------------------------------------------------------------------------------------------------------------------------------------------------------------------------------------------------------------------------------------------------------------------------------------------------------------------------------------------------------------------------------------------------------------------------------------------------------------------------------------------------|--|--------------------------------------------------------------------------------------------------------------------------------------------------------------------------------------------------------------------------------------------------------------------------------------------------------------------------------------------------------------------------------------------------------------------------------------------------------------------------------------------------------------------------------------------------------------------------------------------------|
|  | <p>9. Loss of capacity to evaluate clinical and ethical situations; impaired decision-making ability</p> <p>10. Becoming distracted, unfocused</p> <p>11. Increased levels or risk of burnout from physical and emotional stress</p> <p>12. Increased dissatisfaction with work or quality of care provided</p> <p>13. Physical, emotional and compassion fatigue and exhaustion</p> <p>14. Loss of professional, personal or moral integrity</p> <p>15. Loss of professional or moral identity</p> <p>Negative impacts to patients and families</p> <p>1. Reduced quality of care</p> |  | <ul style="list-style-type: none"> <li>• Not giving standard of care due to non-medical factors like citizenship, ability to pay</li> <li>• Not giving standard of care due to reluctance advocating the interests of their patients for fear of discord with the parental prerogative or institutional constraints</li> <li>• Resort to untruthful methods (e.g. lying about lab values) to get patient the care they need</li> </ul> <p>Victims of medical hierarchy</p> <ul style="list-style-type: none"> <li>• Inability to question decisions of superior even though decisions</li> </ul> |
|--|----------------------------------------------------------------------------------------------------------------------------------------------------------------------------------------------------------------------------------------------------------------------------------------------------------------------------------------------------------------------------------------------------------------------------------------------------------------------------------------------------------------------------------------------------------------------------------------|--|--------------------------------------------------------------------------------------------------------------------------------------------------------------------------------------------------------------------------------------------------------------------------------------------------------------------------------------------------------------------------------------------------------------------------------------------------------------------------------------------------------------------------------------------------------------------------------------------------|

|  |                                                                                                                                                                                                                                                                                                                                                                                                                                                                                                                                                                                                                                                                           |  |                                                                                                                                                                                                                                                                                                                                                                                                                                                                                                                                                         |
|--|---------------------------------------------------------------------------------------------------------------------------------------------------------------------------------------------------------------------------------------------------------------------------------------------------------------------------------------------------------------------------------------------------------------------------------------------------------------------------------------------------------------------------------------------------------------------------------------------------------------------------------------------------------------------------|--|---------------------------------------------------------------------------------------------------------------------------------------------------------------------------------------------------------------------------------------------------------------------------------------------------------------------------------------------------------------------------------------------------------------------------------------------------------------------------------------------------------------------------------------------------------|
|  | <ol style="list-style-type: none"> <li>2. Reduced patient safety (increased medical errors, unsafe healthcare)</li> <li>3. Provision of inappropriate treatments</li> <li>4. Worse patient outcomes (increasing length of stay, increased pain levels, reduced patient satisfaction)</li> <li>5. Destructive emotional responses towards patients (Emotional detachment, decreased empathy, cynicism, dehumanization, depersonalization, anger, frustration)</li> <li>6. Decreased compassion, courtesy, respect to patient</li> <li>7. Avoidance and abandonment of patients (physical, emotional and spiritual)</li> <li>8. Inadequate attention to patients</li> </ol> |  | <p>seem contrary to what physician believed was right</p> <ul style="list-style-type: none"> <li>• Each step up the hierarchy of patient care will feel less MD as they're further removed from the patient</li> </ul> <p>Workload overload</p> <ul style="list-style-type: none"> <li>• Time constraints and having too much paperwork</li> <li>• Lacking work life balance</li> <li>• Increased work stress</li> </ul> <p>Poor working environment</p> <ul style="list-style-type: none"> <li>• Poor institutional culture/ethical climate</li> </ul> |
|--|---------------------------------------------------------------------------------------------------------------------------------------------------------------------------------------------------------------------------------------------------------------------------------------------------------------------------------------------------------------------------------------------------------------------------------------------------------------------------------------------------------------------------------------------------------------------------------------------------------------------------------------------------------------------------|--|---------------------------------------------------------------------------------------------------------------------------------------------------------------------------------------------------------------------------------------------------------------------------------------------------------------------------------------------------------------------------------------------------------------------------------------------------------------------------------------------------------------------------------------------------------|

|  |                                                                                                                                                                                                                                                                                                                                                                                                                                                                                                                |  |                                                                                                                                                                                                                                                                                                                                                                                                                                                                                                                                                                               |
|--|----------------------------------------------------------------------------------------------------------------------------------------------------------------------------------------------------------------------------------------------------------------------------------------------------------------------------------------------------------------------------------------------------------------------------------------------------------------------------------------------------------------|--|-------------------------------------------------------------------------------------------------------------------------------------------------------------------------------------------------------------------------------------------------------------------------------------------------------------------------------------------------------------------------------------------------------------------------------------------------------------------------------------------------------------------------------------------------------------------------------|
|  | <p>9. Withdrawal from patient care (Conscience objection)</p> <p>10. Refusal to provide care</p> <p>11. Worsen physician-patient relationship (impression of physicians being uncaring, damaged trust, mismatch between patient expectations and care provided)</p> <p>Negative impacts to healthcare team, institution and system</p> <p>1. Poor relationships with colleagues, expression of frustration bitterness, anger and cynicism towards co-workers</p> <p>2. Decrease department and unit morale</p> |  | <ul style="list-style-type: none"> <li>• Poor team dynamics with team member's ethical misconduct</li> <li>• Poor team collaboration</li> </ul> <p>Poor communication with colleagues and patients causing MD</p> <ul style="list-style-type: none"> <li>• Inadequate communication between clinicians and families</li> <li>• Poor communication in team</li> <li>• Compromising on informed consent e.g. lacking disclosure of salient facts and prognosis</li> <li>• Providing false hope/dishonest communication</li> <li>• Consent for autopsy as cause of MD</li> </ul> |
|--|----------------------------------------------------------------------------------------------------------------------------------------------------------------------------------------------------------------------------------------------------------------------------------------------------------------------------------------------------------------------------------------------------------------------------------------------------------------------------------------------------------------|--|-------------------------------------------------------------------------------------------------------------------------------------------------------------------------------------------------------------------------------------------------------------------------------------------------------------------------------------------------------------------------------------------------------------------------------------------------------------------------------------------------------------------------------------------------------------------------------|



|  |                                                                                                                                                                                                                                                                                                                                                                                                                                                                                                                                                                                 |  |                                                                                                                                                                                                                                                                                                                                                                                                                                                                                                                                          |
|--|---------------------------------------------------------------------------------------------------------------------------------------------------------------------------------------------------------------------------------------------------------------------------------------------------------------------------------------------------------------------------------------------------------------------------------------------------------------------------------------------------------------------------------------------------------------------------------|--|------------------------------------------------------------------------------------------------------------------------------------------------------------------------------------------------------------------------------------------------------------------------------------------------------------------------------------------------------------------------------------------------------------------------------------------------------------------------------------------------------------------------------------------|
|  | <p>3. Increased dropout rates of staff, difficulty in staff retention, increased cost of training new staff</p> <p>4. Threatening integrity of healthcare providers and systems</p> <p>Positive impacts</p> <p>1. Aids in identifying ethical issues</p> <p>2. Positive impact on patient care (Indicator of conflicting opinions on patient care, Indication of inappropriate care for patients, Important for decision making processes, Re-evaluation to improve medical care plans)</p> <p>3. Encourage Institutional level changes (Increased discussion about issues,</p> |  | <p>Providing suboptimal patient care</p> <ul style="list-style-type: none"> <li>• Difficulties in decision making (e.g. having to make the choice between life and death)</li> <li>• Conflicting opinions about care</li> <li>• Multiple competing interests (e.g. Doctors felt they had to work under multiple pressures—from patients, family)</li> <li>• Causing unintended harm (e.g. inflicting physical trauma on patients in process of resuscitation/care)</li> <li>• Patient bleeding while on anticoagulants a/w MD</li> </ul> |
|--|---------------------------------------------------------------------------------------------------------------------------------------------------------------------------------------------------------------------------------------------------------------------------------------------------------------------------------------------------------------------------------------------------------------------------------------------------------------------------------------------------------------------------------------------------------------------------------|--|------------------------------------------------------------------------------------------------------------------------------------------------------------------------------------------------------------------------------------------------------------------------------------------------------------------------------------------------------------------------------------------------------------------------------------------------------------------------------------------------------------------------------------------|

|  |                                                                                                                                                                            |  |                                                                                                                                                                                                                                                                                                                                                                                                                                                                                                                             |
|--|----------------------------------------------------------------------------------------------------------------------------------------------------------------------------|--|-----------------------------------------------------------------------------------------------------------------------------------------------------------------------------------------------------------------------------------------------------------------------------------------------------------------------------------------------------------------------------------------------------------------------------------------------------------------------------------------------------------------------------|
|  | <p>Reflection on institutional climate, Team reflection, Advocating for implementation of new policies)</p> <p>4. Encourage individual reflection and self-improvement</p> |  | <ul style="list-style-type: none"> <li>• Children surviving with serious disabilities</li> <li>• expectations, legal obligations and their own ethical values)</li> <li>• Lack of provider continuity</li> </ul> <p>Experiencing sexual assault</p> <p>Effect on working ability of physician and functioning of the workplace</p> <ul style="list-style-type: none"> <li>• Reduced staff capacity</li> <li>• Reduced ability to provide care for patients</li> <li>• Burnout</li> <li>• Question purpose of job</li> </ul> |
|--|----------------------------------------------------------------------------------------------------------------------------------------------------------------------------|--|-----------------------------------------------------------------------------------------------------------------------------------------------------------------------------------------------------------------------------------------------------------------------------------------------------------------------------------------------------------------------------------------------------------------------------------------------------------------------------------------------------------------------------|

|  |  |  |                                                                                                                                                                                                                                                                                                                                                                                                                                                                                                                                                                             |
|--|--|--|-----------------------------------------------------------------------------------------------------------------------------------------------------------------------------------------------------------------------------------------------------------------------------------------------------------------------------------------------------------------------------------------------------------------------------------------------------------------------------------------------------------------------------------------------------------------------------|
|  |  |  | <ul style="list-style-type: none"><li>• Decreased self esteem and increased sense of failure</li><li>• Apprehension when interacting with patient/patient family</li><li>• Cognitive errors/adverse safety events</li><li>• Reduced workplace satisfaction</li></ul> <p>Alleviating factors of MD</p> <ul style="list-style-type: none"><li>• Patient gave prior clear preference about care</li><li>• Good patient understanding about resource limitations</li><li>• Physician participation in medical ethics courses</li><li>• Increased physician experience</li></ul> |
|--|--|--|-----------------------------------------------------------------------------------------------------------------------------------------------------------------------------------------------------------------------------------------------------------------------------------------------------------------------------------------------------------------------------------------------------------------------------------------------------------------------------------------------------------------------------------------------------------------------------|

|  |  |  |                                                                                                                                                                                                                                                                                                                                                                                                                                                                                                                     |
|--|--|--|---------------------------------------------------------------------------------------------------------------------------------------------------------------------------------------------------------------------------------------------------------------------------------------------------------------------------------------------------------------------------------------------------------------------------------------------------------------------------------------------------------------------|
|  |  |  | <ul style="list-style-type: none"><li>• Increased interdisciplinary collaboration and professional autonomy</li></ul> <p>Team- and institutional-level interventions to reduce MD</p> <ul style="list-style-type: none"><li>• Reflection and discussion about event</li><li>• Improvement of team camaraderie and shared values/support</li><li>• Provide practical strategies for distributing caregiver burden</li><li>• Individual self-care (e.g. hobbies, taking breaks, suppression or distraction)</li></ul> |
|--|--|--|---------------------------------------------------------------------------------------------------------------------------------------------------------------------------------------------------------------------------------------------------------------------------------------------------------------------------------------------------------------------------------------------------------------------------------------------------------------------------------------------------------------------|

|  |  |  |                                                                                                                                                                                                                                                                                                                                                                                                                                                                                                              |
|--|--|--|--------------------------------------------------------------------------------------------------------------------------------------------------------------------------------------------------------------------------------------------------------------------------------------------------------------------------------------------------------------------------------------------------------------------------------------------------------------------------------------------------------------|
|  |  |  | <ul style="list-style-type: none"><li>• Acknowledging, anticipating, and focusing responses on areas causing MD</li><li>• Standardising protocols for communication and decision making</li><li>• Mitigating inequities by deliberate safeguards for the vulnerable</li><li>• Approach to care provision that include both cultural and spiritual humility</li><li>• Develop adequate infrastructure for sufficient care</li><li>• Improving education on medical ethics and reduction of distress</li></ul> |
|--|--|--|--------------------------------------------------------------------------------------------------------------------------------------------------------------------------------------------------------------------------------------------------------------------------------------------------------------------------------------------------------------------------------------------------------------------------------------------------------------------------------------------------------------|

|                           |                                                                                                                                                                                                                                                   |                                         |                                                                                                                                                                                                                                                                                                                                                                                   |
|---------------------------|---------------------------------------------------------------------------------------------------------------------------------------------------------------------------------------------------------------------------------------------------|-----------------------------------------|-----------------------------------------------------------------------------------------------------------------------------------------------------------------------------------------------------------------------------------------------------------------------------------------------------------------------------------------------------------------------------------|
|                           |                                                                                                                                                                                                                                                   |                                         | <ul style="list-style-type: none"> <li>• Shift responsibility for rationing decisions to higher authorities</li> <li>• Adequate access to education in ethics and support</li> <li>• Peer support and use of experiential learning to enhance socialization, while exploring actual cases to foster ethical responsibility</li> <li>• Instituting End of Life training</li> </ul> |
| <b>Tools to assess MD</b> | <p>Direct measure of MD</p> <ol style="list-style-type: none"> <li>1. MD Scale (MDS) and revised versions</li> <li>2. MD Thermometer (MDT)</li> <li>3. MD model (MDM) framework</li> <li>4. Measure of MD for Healthcare Professionals</li> </ol> | <b>Disharmony (Intra-ring conflict)</b> | <p>Disconnect between moral intuition and latent biases</p> <p>Internal moral and ethical dilemmas (individual ring)</p> <ul style="list-style-type: none"> <li>○ Conflict between concerns about patient's suffering and belief in</li> </ul>                                                                                                                                    |

|  |                                                                                                                                                                                                                                                                                                                                                                                                                                                                                                                                                           |  |                                                                                                                                                                                                                                                                                                                                                                                                                                                                                                                                                                                                               |
|--|-----------------------------------------------------------------------------------------------------------------------------------------------------------------------------------------------------------------------------------------------------------------------------------------------------------------------------------------------------------------------------------------------------------------------------------------------------------------------------------------------------------------------------------------------------------|--|---------------------------------------------------------------------------------------------------------------------------------------------------------------------------------------------------------------------------------------------------------------------------------------------------------------------------------------------------------------------------------------------------------------------------------------------------------------------------------------------------------------------------------------------------------------------------------------------------------------|
|  | <p>5. Adapted from 2015 ACGME Milestones for Neurological Surgery</p> <p>Evaluation of the impact of MD</p> <ol style="list-style-type: none"> <li>1. Revised MDS</li> <li>2. Maslach Burnout Tool</li> <li>3. Professional Quality of Life Scale</li> </ol> <p>Evaluation of the factors affecting MD</p> <ol style="list-style-type: none"> <li>1. Revised MDS</li> <li>2. C-Change Resident Survey</li> </ol> <p>Evaluation of the responses to MD</p> <ol style="list-style-type: none"> <li>1. Batson's model and Eisenberg's elaboration</li> </ol> |  | <p>further measures to support recovery</p> <ul style="list-style-type: none"> <li>○ Conflict between sanctity of life and sanctity of choice</li> </ul> <p>Conflict between physicians' perspectives and action (individual ring)</p> <ul style="list-style-type: none"> <li>○ Having to perform interventions that one does not agree with</li> <li>○ Conflict between desire to bend the rules for patients, and concern about personal integrity</li> <li>○ Conflict between ethics in theory and ethics in practice</li> <li>○ Value congruence between intrinsic values and practiced values</li> </ul> |
|--|-----------------------------------------------------------------------------------------------------------------------------------------------------------------------------------------------------------------------------------------------------------------------------------------------------------------------------------------------------------------------------------------------------------------------------------------------------------------------------------------------------------------------------------------------------------|--|---------------------------------------------------------------------------------------------------------------------------------------------------------------------------------------------------------------------------------------------------------------------------------------------------------------------------------------------------------------------------------------------------------------------------------------------------------------------------------------------------------------------------------------------------------------------------------------------------------------|

|  |                                                                                                                                                                                                                                                                 |  |                                                                                                                                                                                                                                                                                                                                                                                                                                                                                                                                 |
|--|-----------------------------------------------------------------------------------------------------------------------------------------------------------------------------------------------------------------------------------------------------------------|--|---------------------------------------------------------------------------------------------------------------------------------------------------------------------------------------------------------------------------------------------------------------------------------------------------------------------------------------------------------------------------------------------------------------------------------------------------------------------------------------------------------------------------------|
|  | <p>2. Framework for addressing MD (Rushton et al., 2013a)</p> <p>3. Framework for ethical decisions during MD (Martin, 2019)</p> <p>4. Critical Incident Technique (Lievrouw et al., 2016)</p> <p>Qualitative frameworks (interview, open-end focus groups)</p> |  | <p>Inability to fulfil professional standards and obligations due to other factors within the societal ring (societal ring)</p> <ul style="list-style-type: none"> <li>○ Conflicting professional roles – role of physician (provision of care) vs managerial role (gatekeeper of spending resources)</li> <li>○ Professional standards and obligations vs resource limitations/insufficient resources</li> <li>○ Professional standards and obligations vs pressure from administrators or insurers to reduce costs</li> </ul> |
|--|-----------------------------------------------------------------------------------------------------------------------------------------------------------------------------------------------------------------------------------------------------------------|--|---------------------------------------------------------------------------------------------------------------------------------------------------------------------------------------------------------------------------------------------------------------------------------------------------------------------------------------------------------------------------------------------------------------------------------------------------------------------------------------------------------------------------------|



|  |  |  |                                                                                                                                                                                                                                                                                                                                                                                                                                                                                                                                                   |
|--|--|--|---------------------------------------------------------------------------------------------------------------------------------------------------------------------------------------------------------------------------------------------------------------------------------------------------------------------------------------------------------------------------------------------------------------------------------------------------------------------------------------------------------------------------------------------------|
|  |  |  | <ul style="list-style-type: none"><li>○ Professional standards and obligations vs organisational culture and policies</li><li>○ Professional standards and obligations vs hierarchy/ differences in power dynamics between healthcare professionals</li><li>○ Professional standards and obligations vs pressure from patients' parents/ family</li><li>○ Conflict between time spent on administration and documentation, and time spent on direct patient care</li></ul> <p>Balancing incongruent obligations and interests (societal ring)</p> |
|--|--|--|---------------------------------------------------------------------------------------------------------------------------------------------------------------------------------------------------------------------------------------------------------------------------------------------------------------------------------------------------------------------------------------------------------------------------------------------------------------------------------------------------------------------------------------------------|

|                                   |                                                                                                                                                                                                                                                                                                                                                              |                                           |                                                                                                                                                                                                                                                                                                                                                    |
|-----------------------------------|--------------------------------------------------------------------------------------------------------------------------------------------------------------------------------------------------------------------------------------------------------------------------------------------------------------------------------------------------------------|-------------------------------------------|----------------------------------------------------------------------------------------------------------------------------------------------------------------------------------------------------------------------------------------------------------------------------------------------------------------------------------------------------|
|                                   |                                                                                                                                                                                                                                                                                                                                                              |                                           | <ul style="list-style-type: none"> <li>○ Conflict between obligation to the patient and obligation to society (in terms of resource allocation – futility vs distributive justice)</li> <li>○ Conflict between legal requirement to report practices which may harm patients and organisational culture</li> </ul>                                 |
| <b>Interventions to assess MD</b> | <p>Organizational interventions</p> <p>1. Institutional Policies</p> <p style="padding-left: 40px;">Create clear guidelines for patient care</p> <p style="padding-left: 40px;">Allow physicians the choice to excuse themselves from situations they morally object</p> <p style="padding-left: 40px;">Create appropriate channels for lodging concerns</p> | <b>Dyssynchrony (Inter-ring conflict)</b> | <p>Individual vs societal conflict in relation to patient care</p> <ul style="list-style-type: none"> <li>○ Patient requests for care that goes against physician's moral beliefs about what is in the patient's best interest</li> <li>○ Poor communication between physician and the patient, family or other team members leading to</li> </ul> |

|  |                                                                                                                                                                                                                                                                                                                                                                                                                                                            |  |                                                                                                                                                                                                                                                                                                                                                                                                                                                                                                                                                            |
|--|------------------------------------------------------------------------------------------------------------------------------------------------------------------------------------------------------------------------------------------------------------------------------------------------------------------------------------------------------------------------------------------------------------------------------------------------------------|--|------------------------------------------------------------------------------------------------------------------------------------------------------------------------------------------------------------------------------------------------------------------------------------------------------------------------------------------------------------------------------------------------------------------------------------------------------------------------------------------------------------------------------------------------------------|
|  | <p>Protection of physicians from abuse</p> <p>Expansion of the responsibilities of hospital ethics committee</p> <p>2. Team-based discussions and support</p> <p>Interdisciplinary team discussions for medical ethical decision making</p> <p>Team-wide debriefings and discussions about morally distressing situations</p> <p>Team building</p> <p>Sharing of workload among team members</p> <p>Ethics consultations, rounds and group discussions</p> |  | <p>differing perspectives on the right/moral course of action</p> <ul style="list-style-type: none"> <li>○ Physician goes against patient's wishes because the physician believes the action is in the patient's best interest</li> <li>○ Doubt about whether one's actions are morally correct because patient is unable to communicate</li> <li>○ Physician witnesses the suffering of a patient but is unable to relieve the suffering</li> <li>○ Physician has to tell a patient about a poor prognosis but is unable to offer many options</li> </ul> |
|--|------------------------------------------------------------------------------------------------------------------------------------------------------------------------------------------------------------------------------------------------------------------------------------------------------------------------------------------------------------------------------------------------------------------------------------------------------------|--|------------------------------------------------------------------------------------------------------------------------------------------------------------------------------------------------------------------------------------------------------------------------------------------------------------------------------------------------------------------------------------------------------------------------------------------------------------------------------------------------------------------------------------------------------------|

|  |                                                                                                                                                                                                                                                                                                                                                                                                                                        |  |                                                                                                                                                                                                                                                                                                                                                                                                                                                                                                                                      |
|--|----------------------------------------------------------------------------------------------------------------------------------------------------------------------------------------------------------------------------------------------------------------------------------------------------------------------------------------------------------------------------------------------------------------------------------------|--|--------------------------------------------------------------------------------------------------------------------------------------------------------------------------------------------------------------------------------------------------------------------------------------------------------------------------------------------------------------------------------------------------------------------------------------------------------------------------------------------------------------------------------------|
|  | <p>Forums</p> <p>3. Individual-focused interventions</p> <p>Psychological support and empowerment</p> <p>Mindfulness and resilience training</p> <p>Allocated time for self-reflection</p> <p>Burn-out related resources/toolkit for physicians</p> <p>Personal well-being management and professional satisfaction training</p> <p>Cognitive Processing Therapies</p> <p>Teaching Emotional Freedom Techniques</p> <p>Counselling</p> |  | <ul style="list-style-type: none"> <li>○ Family requests for aggressive care that may harm the patient and goes against physician's moral beliefs about what is in the patient's best interest.</li> <li>○ Physician follows family's request due to fear of a lawsuit despite it going against his/her moral beliefs</li> <li>○ Physician's moral obligation to provide care to the patient goes against the wellbeing of the patient's family</li> </ul> <p>Individual vs societal conflict in relation to intra-team dynamics</p> |
|--|----------------------------------------------------------------------------------------------------------------------------------------------------------------------------------------------------------------------------------------------------------------------------------------------------------------------------------------------------------------------------------------------------------------------------------------|--|--------------------------------------------------------------------------------------------------------------------------------------------------------------------------------------------------------------------------------------------------------------------------------------------------------------------------------------------------------------------------------------------------------------------------------------------------------------------------------------------------------------------------------------|

|  |                                                                                                                                                                                                                                                                                                                                                                                                                                                                                                                             |  |                                                                                                                                                                                                                                                                                                                                                                                                                                                                                                                                                                                                         |
|--|-----------------------------------------------------------------------------------------------------------------------------------------------------------------------------------------------------------------------------------------------------------------------------------------------------------------------------------------------------------------------------------------------------------------------------------------------------------------------------------------------------------------------------|--|---------------------------------------------------------------------------------------------------------------------------------------------------------------------------------------------------------------------------------------------------------------------------------------------------------------------------------------------------------------------------------------------------------------------------------------------------------------------------------------------------------------------------------------------------------------------------------------------------------|
|  | <p>MD consultation service</p> <p>4. Education and research</p> <p>Education about the concept of MD</p> <p>Training on palliative care</p> <p>Ethics skills training</p> <p>Communication skills training</p> <p>Training on knowledge and skills for dealing with the pressures of hospital work</p> <p>Education on strategies for distributing the caregiver burden</p> <p>Education to prepare students for the challenges of the current institutional setting, with focus on junior doctors' individual identity</p> |  | <ul style="list-style-type: none"> <li>○ Team provides care that may harm the patient and goes against physician's moral beliefs about what is in the patient's best interest.</li> <li>○ Team decides to limit or withdraw care which goes against physician's moral desire to preserve life</li> <li>○ Physician has to compromise his/her morals in order to complete his/her work</li> <li>○ Team decides to limit or withdraw care which goes against physician's moral desire to preserve life</li> <li>○ Physician has to compromise his/her morals in order to complete his/her work</li> </ul> |
|--|-----------------------------------------------------------------------------------------------------------------------------------------------------------------------------------------------------------------------------------------------------------------------------------------------------------------------------------------------------------------------------------------------------------------------------------------------------------------------------------------------------------------------------|--|---------------------------------------------------------------------------------------------------------------------------------------------------------------------------------------------------------------------------------------------------------------------------------------------------------------------------------------------------------------------------------------------------------------------------------------------------------------------------------------------------------------------------------------------------------------------------------------------------------|

|  |                                                                                                                                                                                                                                                                                                                                                                                                                                                                                                                                    |  |                                                                                                                                                                                                                                                                                                                                                                                                                                                                                                                                           |
|--|------------------------------------------------------------------------------------------------------------------------------------------------------------------------------------------------------------------------------------------------------------------------------------------------------------------------------------------------------------------------------------------------------------------------------------------------------------------------------------------------------------------------------------|--|-------------------------------------------------------------------------------------------------------------------------------------------------------------------------------------------------------------------------------------------------------------------------------------------------------------------------------------------------------------------------------------------------------------------------------------------------------------------------------------------------------------------------------------------|
|  | <p>Promote research to understand issues causing MD</p> <p>5. Creating a conducive environment</p> <p>Create safe, supportive and well-organized environments</p> <p>Reduce hierarchy</p> <p>Individual coping mechanisms</p> <p>1. Dissociation from distressing situation</p> <p>2. Engage in self-destructive behaviour (excessive alcohol consumption, self-blame)</p> <p>3. Engage in self-constructive practices (e.g. Mindfulness training/ Meditation, Healing rituals, Take care of basic needs, Exercise/ Yoga, etc)</p> |  | <ul style="list-style-type: none"> <li>○ Physician feels compelled to follow instructions without protest or to remain silent about moral concerns due to hierarchy</li> <li>○ Physician is blamed for an adverse outcome despite acting morally</li> <li>○ Physician witnesses colleagues providing inadequate or unethical care</li> <li>○ Physician witnesses colleagues providing false hope or inadequate information</li> <li>○ Physician keeps colleague's medical error a secret despite moral obligation to report it</li> </ul> |
|--|------------------------------------------------------------------------------------------------------------------------------------------------------------------------------------------------------------------------------------------------------------------------------------------------------------------------------------------------------------------------------------------------------------------------------------------------------------------------------------------------------------------------------------|--|-------------------------------------------------------------------------------------------------------------------------------------------------------------------------------------------------------------------------------------------------------------------------------------------------------------------------------------------------------------------------------------------------------------------------------------------------------------------------------------------------------------------------------------------|

|  |                                                                                                                                                                                                                                                                                                                                                                                                                                                                                                                                                                                                                                        |  |                                                                                                                                                                                                                                                                                                                                                                                                                                                                                                                                                                                            |
|--|----------------------------------------------------------------------------------------------------------------------------------------------------------------------------------------------------------------------------------------------------------------------------------------------------------------------------------------------------------------------------------------------------------------------------------------------------------------------------------------------------------------------------------------------------------------------------------------------------------------------------------------|--|--------------------------------------------------------------------------------------------------------------------------------------------------------------------------------------------------------------------------------------------------------------------------------------------------------------------------------------------------------------------------------------------------------------------------------------------------------------------------------------------------------------------------------------------------------------------------------------------|
|  | <p>4. Emotional regulation (e.g. Crying, Ability to name the feeling, Down-regulate by pausing and taking deep breaths, etc)</p> <p>5. Changing perspective of situation (e.g. Rationalization, Positive reframing, Seeing the bigger picture, etc)</p> <p>6. Camaraderie and social support (Venting to colleague or friend, etc)</p> <p>7. Relying on experiences over time to cope with MD (Self-realization over time)</p> <p>8. Preventing MD</p> <p>9. Involving patients and patient's families in treatment plans to prevent MD</p> <p>10. Improved skills to handle MD</p> <p>11. Help to deal with distressing situation</p> |  | <ul style="list-style-type: none"> <li>○ Physician witnesses diminished patient care due to poor team communication</li> </ul> <p>Individual vs societal conflict due to societal constraints</p> <ul style="list-style-type: none"> <li>○ Physicians are unable to deliver the standard of care they wish to deliver due to institutional limitations</li> <li>○ Physician is forced to take on the role of rationing resources due to limitations in resources</li> <li>○ Physician is unable to act in accordance with his/her moral values due to institutional constraints</li> </ul> |
|--|----------------------------------------------------------------------------------------------------------------------------------------------------------------------------------------------------------------------------------------------------------------------------------------------------------------------------------------------------------------------------------------------------------------------------------------------------------------------------------------------------------------------------------------------------------------------------------------------------------------------------------------|--|--------------------------------------------------------------------------------------------------------------------------------------------------------------------------------------------------------------------------------------------------------------------------------------------------------------------------------------------------------------------------------------------------------------------------------------------------------------------------------------------------------------------------------------------------------------------------------------------|

|  |                                                                                                                                                                                                                                                                                |  |                                                                                                                                                                                                                                                                                                                                                                                                                                                                                                                                                                                            |
|--|--------------------------------------------------------------------------------------------------------------------------------------------------------------------------------------------------------------------------------------------------------------------------------|--|--------------------------------------------------------------------------------------------------------------------------------------------------------------------------------------------------------------------------------------------------------------------------------------------------------------------------------------------------------------------------------------------------------------------------------------------------------------------------------------------------------------------------------------------------------------------------------------------|
|  | <p>Principles of interventions</p> <ol style="list-style-type: none"> <li>1. Multi-level interventions at the individual, team and organizational levels are required to address MD</li> <li>2. Empowerment of physicians (Encouragement of physicians to speak up)</li> </ol> |  | <ul style="list-style-type: none"> <li>○ Physician witnesses patient suffering due to a lack of provider continuity</li> <li>○ Physician faces financial incentives to continue delivering care that goes against physician's moral beliefs about what is in the patient's best interest.</li> <li>○ Physician is forced to care for patients he/she does not feel qualified to care for</li> <li>○ Physician's legal obligations go against his/her own moral beliefs</li> <li>○ Erosion of individual values/ethical integrity due to discordant values with the organisation</li> </ul> |
|--|--------------------------------------------------------------------------------------------------------------------------------------------------------------------------------------------------------------------------------------------------------------------------------|--|--------------------------------------------------------------------------------------------------------------------------------------------------------------------------------------------------------------------------------------------------------------------------------------------------------------------------------------------------------------------------------------------------------------------------------------------------------------------------------------------------------------------------------------------------------------------------------------------|



|  |  |  |                                                                                                                                                                                                                                                                                                                                                                             |
|--|--|--|-----------------------------------------------------------------------------------------------------------------------------------------------------------------------------------------------------------------------------------------------------------------------------------------------------------------------------------------------------------------------------|
|  |  |  | <p>Innate vs societal conflict</p> <ul style="list-style-type: none"><li>○ Team provides care that goes against the physician's religious beliefs</li></ul> <p>Relational vs societal conflict</p> <ul style="list-style-type: none"><li>○ Tension between physicians' personal obligation to protect his/her own family and obligation to serve patients in need</li></ul> |
|--|--|--|-----------------------------------------------------------------------------------------------------------------------------------------------------------------------------------------------------------------------------------------------------------------------------------------------------------------------------------------------------------------------------|
