# Supplementary material for: Systematic scoping review on moral distress among physicians
Source: PubMed Central journal article supplement — BMJ Open. 2022 Sep 2;12(9):e064029. doi: 10.1136/bmjopen-2022-064029 (PMC9442489; doi:10.1136/bmjopen-2022-064029), 2022-09-02
Supplement: bmjopen-2022-064029supp005.pdf [file bmjopen-2022-064029supp005.pdf]

## Supplementary material E. Components of the Standard Hamric MDS-R and the MMD-HP

| Dyssynchrony/ Disharmony              | Items                                                                                                                                                                                                                                                                                                                                                                                                                                                                                                                                                                                                                                                                                                                                                                                                                                                                                                                                                                                                                                                                                                                                                                                                                                                                                                                    |
|---------------------------------------|--------------------------------------------------------------------------------------------------------------------------------------------------------------------------------------------------------------------------------------------------------------------------------------------------------------------------------------------------------------------------------------------------------------------------------------------------------------------------------------------------------------------------------------------------------------------------------------------------------------------------------------------------------------------------------------------------------------------------------------------------------------------------------------------------------------------------------------------------------------------------------------------------------------------------------------------------------------------------------------------------------------------------------------------------------------------------------------------------------------------------------------------------------------------------------------------------------------------------------------------------------------------------------------------------------------------------|
| <b>MDS-R</b>                          |                                                                                                                                                                                                                                                                                                                                                                                                                                                                                                                                                                                                                                                                                                                                                                                                                                                                                                                                                                                                                                                                                                                                                                                                                                                                                                                          |
| Individual-societal ring dyssynchrony | <p data-bbox="629 499 1290 528">Individual-societal ring conflict in relation to patient care</p> <ul style="list-style-type: none"> <li data-bbox="674 568 1827 596">• “Provide less than optimal care due to pressures from administrators or insurers to reduce costs.”</li> <li data-bbox="674 639 1906 732">• “Follow the family’s wishes to continue life support even though I believe it is not in the best interest of the patient”</li> <li data-bbox="674 775 1783 804">• “Follow the family’s request not to discuss death with a dying patient who asks about dying”</li> <li data-bbox="674 847 1760 876">• “Feel pressure from others to order what I consider to be unnecessary tests and treatments”</li> <li data-bbox="674 919 1906 1011">• “Continue to participate in care for a hopelessly ill person who is being sustained on a ventilator, when no one will make a decision to withdraw support”</li> <li data-bbox="674 1054 1906 1147">• “Ignore situations in which patients have not been given adequate information to insure informed consent”</li> <li data-bbox="674 1190 1491 1219">• “Watch patient care suffer because of a lack of provider continuity”</li> <li data-bbox="674 1262 1480 1291">• “Be required to care for patients I do not feel qualified to care for”</li> </ul> |

|  |                                                                                                                                                                                                                                                                                                                                                                                                                                                                                                                                                                                                                                                                                                                                                                                                                                                                                                                                                                                                                                                                                                                                                                                                                                             |
|--|---------------------------------------------------------------------------------------------------------------------------------------------------------------------------------------------------------------------------------------------------------------------------------------------------------------------------------------------------------------------------------------------------------------------------------------------------------------------------------------------------------------------------------------------------------------------------------------------------------------------------------------------------------------------------------------------------------------------------------------------------------------------------------------------------------------------------------------------------------------------------------------------------------------------------------------------------------------------------------------------------------------------------------------------------------------------------------------------------------------------------------------------------------------------------------------------------------------------------------------------|
|  | <ul style="list-style-type: none"><li>• “Follow the family’s wishes of the patient’s care when I do not agree with them, but do so because of fears of a lawsuit”</li></ul> <p>Individual-societal ring conflict in relation to intra-team dynamics</p> <ul style="list-style-type: none"><li>• “Assist physician or other health care providers who in my opinion are not as competent as the patient care requires”</li><li>• “Avoid taking action when I learn that a physician or nurse colleague has made a medical error and does not report it”</li><li>• “Witness healthcare providers giving “false hope” to the patient or family”</li><li>• “Witness diminished patient care quality due to poor team communication”</li><li>• “Take no action about an observed ethical issue because the involved staff member or someone in a position of authority requested that I do nothing”</li><li>• “Let medical students perform painful procedures on patients solely to improve their skill”</li></ul> <p>Individual-societal ring conflict due to societal constraints</p> <ul style="list-style-type: none"><li>• “Because of insufficient time, I cannot admit patient and provide complete and appropriate treatment”</li></ul> |
|--|---------------------------------------------------------------------------------------------------------------------------------------------------------------------------------------------------------------------------------------------------------------------------------------------------------------------------------------------------------------------------------------------------------------------------------------------------------------------------------------------------------------------------------------------------------------------------------------------------------------------------------------------------------------------------------------------------------------------------------------------------------------------------------------------------------------------------------------------------------------------------------------------------------------------------------------------------------------------------------------------------------------------------------------------------------------------------------------------------------------------------------------------------------------------------------------------------------------------------------------------|

|                                  |                                                                                                                                                                                                                                                                                                                                                                                                                                                                                                                              |
|----------------------------------|------------------------------------------------------------------------------------------------------------------------------------------------------------------------------------------------------------------------------------------------------------------------------------------------------------------------------------------------------------------------------------------------------------------------------------------------------------------------------------------------------------------------------|
|                                  | <ul style="list-style-type: none"> <li>• “Because of shortage of drugs and medical equipment, I could not provide the appropriate treatment for the patient”</li> <li>• “I do not give the right treatment to the patient because he cannot pay the hospital costs”</li> </ul>                                                                                                                                                                                                                                               |
| Individual ring disharmony       | <ul style="list-style-type: none"> <li>• “Initiate extensive life-saving actions when I think they only prolong death”</li> <li>• “Provide care that does not relieve the patient’s suffering because I fear that increasing the dose of pain medication will cause death”</li> <li>• “Request nurses or others not to discuss the patient’s prognosis with the patient or family”</li> <li>• “Increase the dose of sedatives/opiates for an unconscious patient that I believe could hasten the patient’s death”</li> </ul> |
| MMD-HP                           |                                                                                                                                                                                                                                                                                                                                                                                                                                                                                                                              |
| Individual-societal dyssynchrony | <p>Individual-societal ring conflict in relation to patient care</p> <ul style="list-style-type: none"> <li>• “Be required to care for more patients than I can safely care for.”</li> <li>• “Feel required to overemphasize tasks and productivity or quality measures at the expense of patient care”</li> <li>• “Be required to care for patients whom I do not feel qualified to care for.”</li> </ul>                                                                                                                   |

|  |                                                                                                                                                                                                                                                                                                                                                                                                                                                                                                                                                                                                                                                                                                                                                                                                                                                                                                                                                                                                                                                                                                                                                                                                                                                       |
|--|-------------------------------------------------------------------------------------------------------------------------------------------------------------------------------------------------------------------------------------------------------------------------------------------------------------------------------------------------------------------------------------------------------------------------------------------------------------------------------------------------------------------------------------------------------------------------------------------------------------------------------------------------------------------------------------------------------------------------------------------------------------------------------------------------------------------------------------------------------------------------------------------------------------------------------------------------------------------------------------------------------------------------------------------------------------------------------------------------------------------------------------------------------------------------------------------------------------------------------------------------------|
|  | <ul style="list-style-type: none"><li>• “Be required to work with abusive patients/family members who are compromising quality of care.”</li><li>• “Follow the family’s insistence to continue aggressive treatment even though I believe it is not in the best interest of the patient.”</li><li>• “Continue to provide aggressive treatment for a person who is most likely to die regardless of this treatment when no one will make a decision to withdraw it.”</li><li>• “Feel pressured to order or carry out orders for what I consider to be unnecessary or inappropriate tests and treatments.”</li><li>• “Follow a physician’s or family member’s request not to discuss the patient’s prognosis with the patient/family.”</li><li>• “Be required to work with other healthcare team members who are not as competent as patient care requires.”</li><li>• “Be required to care for patients who have unclear or inconsistent treatment plans or who lack goals of care”</li><li>• “Feel pressured to ignore situations in which patients have not been given adequate information to ensure informed consent”</li><li>• “Participate in care that causes unnecessary suffering or does not adequately relieve pain or symptoms.”</li></ul> |
|--|-------------------------------------------------------------------------------------------------------------------------------------------------------------------------------------------------------------------------------------------------------------------------------------------------------------------------------------------------------------------------------------------------------------------------------------------------------------------------------------------------------------------------------------------------------------------------------------------------------------------------------------------------------------------------------------------------------------------------------------------------------------------------------------------------------------------------------------------------------------------------------------------------------------------------------------------------------------------------------------------------------------------------------------------------------------------------------------------------------------------------------------------------------------------------------------------------------------------------------------------------------|

|  |                                                                                                                                                                                                                                                                                                                                                                                                                                                                                                                                                                                                                                                                                                                                                                                                                                                                                                                                                                                                                                                                                                                                                                                                                            |
|--|----------------------------------------------------------------------------------------------------------------------------------------------------------------------------------------------------------------------------------------------------------------------------------------------------------------------------------------------------------------------------------------------------------------------------------------------------------------------------------------------------------------------------------------------------------------------------------------------------------------------------------------------------------------------------------------------------------------------------------------------------------------------------------------------------------------------------------------------------------------------------------------------------------------------------------------------------------------------------------------------------------------------------------------------------------------------------------------------------------------------------------------------------------------------------------------------------------------------------|
|  | <ul style="list-style-type: none"><li>• “Watch patient care suffer because of a lack of provider continuity.”</li></ul> <p>Individual-societal ring conflict in relation to intra-team dynamics</p> <ul style="list-style-type: none"><li>• “Witness healthcare providers giving “false hope” to a patient or family.”</li><li>• “Feel unsafe/bullied amongst my own colleagues.”</li><li>• “Fear retribution if I speak up.”</li><li>• “Be pressured to avoid taking action when I learn that a physician, nurse, or other team colleague has made a medical error and does not report it.”</li><li>• “Participate on a team that gives inconsistent messages to a patient/family”</li><li>• “Witness a violation of a standard of practice or a code of ethics and not feel sufficiently supported to report the violation.”</li><li>• “Witness low quality of patient care due to poor team communication.”</li><li>• “Work with team members who do not treat vulnerable or stigmatized patients with dignity and respect.”</li><li>• “Work within power hierarchies in teams, units, and my institution that compromise patient care.”</li></ul> <p>Individual-societal ring conflict due to societal constraints</p> |
|--|----------------------------------------------------------------------------------------------------------------------------------------------------------------------------------------------------------------------------------------------------------------------------------------------------------------------------------------------------------------------------------------------------------------------------------------------------------------------------------------------------------------------------------------------------------------------------------------------------------------------------------------------------------------------------------------------------------------------------------------------------------------------------------------------------------------------------------------------------------------------------------------------------------------------------------------------------------------------------------------------------------------------------------------------------------------------------------------------------------------------------------------------------------------------------------------------------------------------------|

|  |                                                                                                                                                                                                                                                                                                                                                                                                                                                                                                                                                                   |
|--|-------------------------------------------------------------------------------------------------------------------------------------------------------------------------------------------------------------------------------------------------------------------------------------------------------------------------------------------------------------------------------------------------------------------------------------------------------------------------------------------------------------------------------------------------------------------|
|  | <ul style="list-style-type: none"><li>• “Experience compromised patient care due to lack of resources/equipment/bed capacity.”</li><li>• “Have excessive documentation requirements that compromise patient care.”</li><li>• “Be unable to provide optimal care due to pressures from administrators or insurers to reduce costs.”</li><li>• “Experience lack of administrative action or support for a problem that is compromising patient care.”</li><li>• “Participate in care that I do not agree with, but do so because of fears of litigation.”</li></ul> |
|--|-------------------------------------------------------------------------------------------------------------------------------------------------------------------------------------------------------------------------------------------------------------------------------------------------------------------------------------------------------------------------------------------------------------------------------------------------------------------------------------------------------------------------------------------------------------------|
